# Supplementary material for: Molecular-level pictures of the phase transitions of saturated and unsaturated phospholipid binary mixtures
Source: Royal Society of Chemistry journal article supplement (doi:10.1039/c4ra07569b), 2014-11-19
Supplement: c4ra07569b1.pdf [file c4ra07569b1.pdf]

**Electronic supplementary information for:**

**Molecular-Level Pictures of the Phase Transitions of Saturated and Unsaturated  
Phospholipid Binary Mixtures†**

Fu-Gen Wu,<sup>\*ab</sup> Hai-Yuan Sun,<sup>a</sup> Yu Zhou,<sup>a</sup> Geng Deng<sup>a</sup> and Zhi-Wu Yu<sup>\*a</sup>

<sup>a</sup>Key Laboratory of Bioorganic Phosphorous Chemistry and Chemical Biology (Ministry of Education), Department of Chemistry, Tsinghua University, Beijing 100084, P. R. China

<sup>b</sup>State Key Laboratory of Bioelectronics, School of Biological Science and Medical Engineering, Southeast University, Nanjing 210096, China

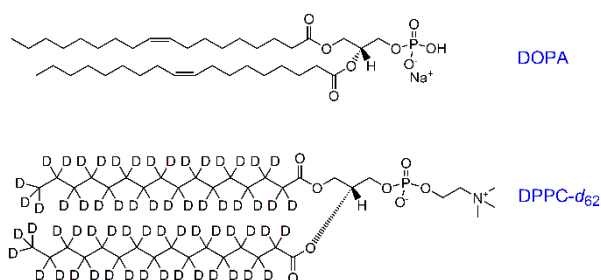

**Fig. S1.** Molecular structures of DOPA and DPPC-*d*<sub>62</sub>.

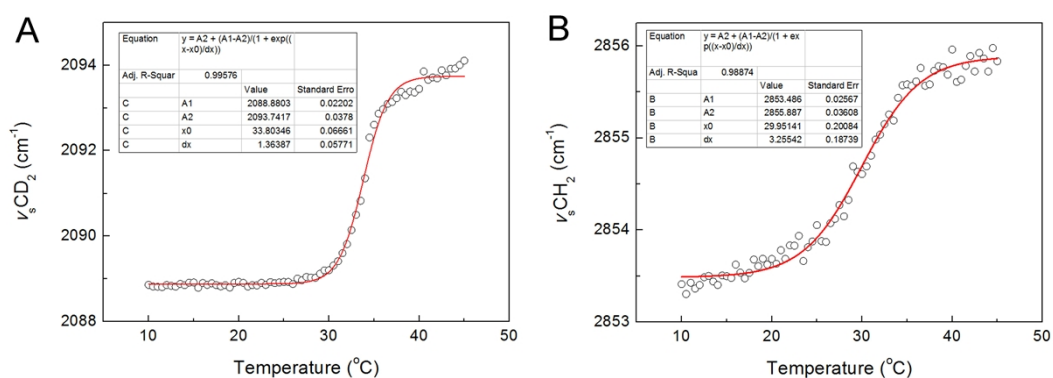

**Fig. S2.** Sigmoidal fitting of the temperature-dependent wavenumber changes of  $\nu_s\text{CH}_2$  (in DOPA) and  $\nu_s\text{CD}_2$  (in DPPC- $d_{62}$ ) in 10% DOPA sample to determine the transition temperatures of the two respective lipids (DPPC- $d_{62}$  and DOPA).

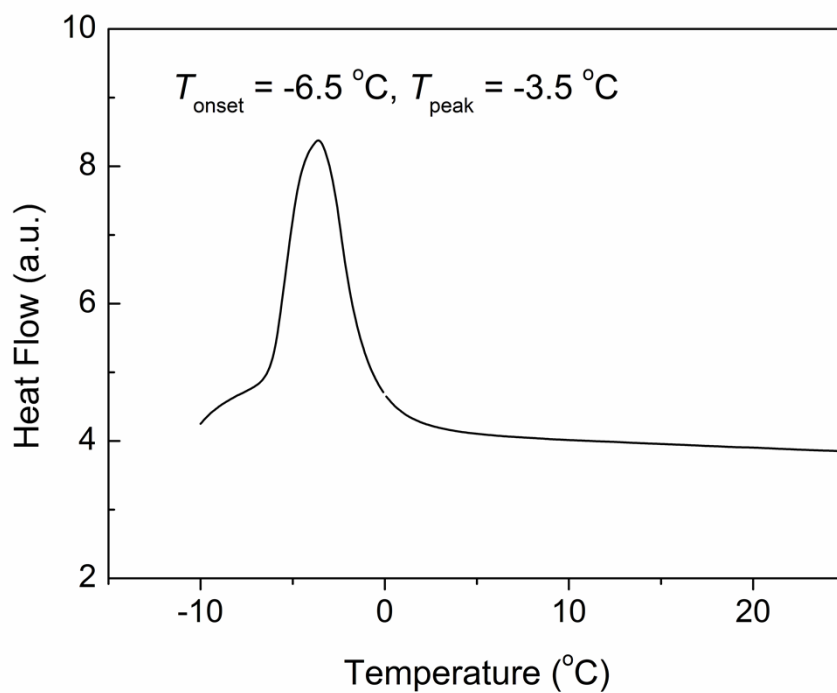

**Fig. S3.** DSC curve for a pure DOPA aqueous dispersion (DOPA :  $\text{H}_2\text{O} = 1/3$ , wt/wt).

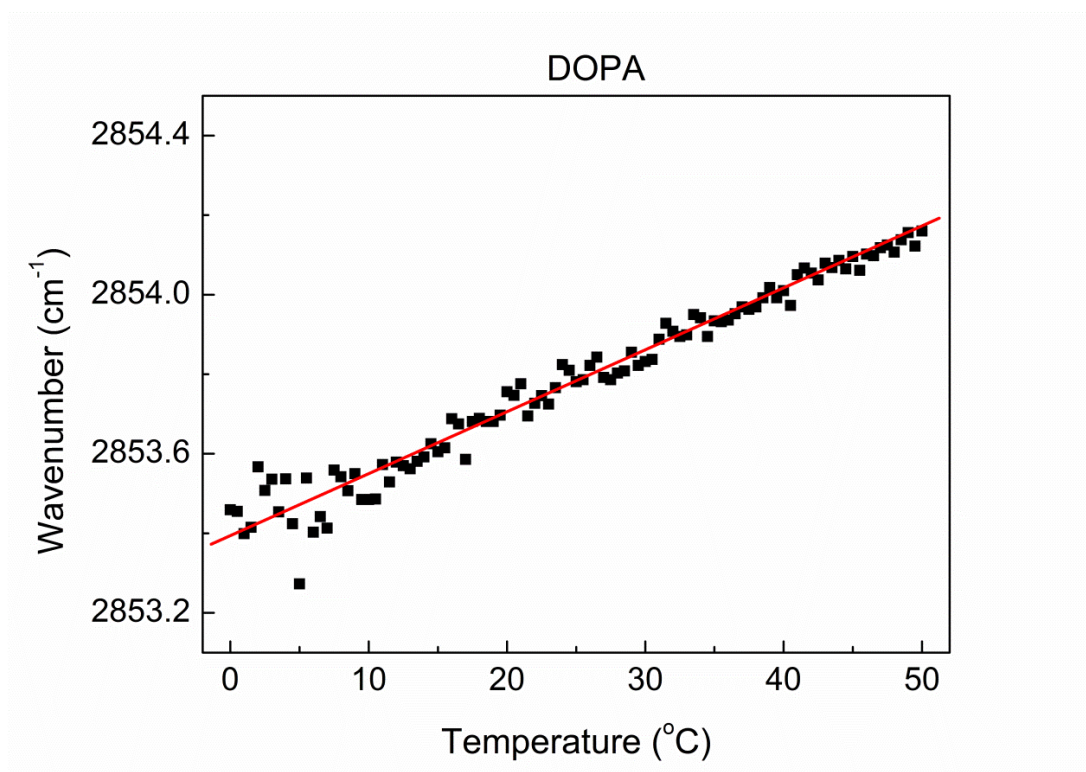

**Fig. S4.** Dependence of FTIR peak positions of  $\nu_s\text{CH}_2$  in DOPA on temperature in a pure DOPA aqueous dispersion (DOPA :  $\text{H}_2\text{O}$  = 1/3, wt/wt). The DOPA sample was in fluid phase throughout the temperature of 0–50 °C, as has been demonstrated from the DSC result in Figure S1.
